# Supplementary material for: One-step green synthesis of carbon dots derived fromPlumeria albaflowers for sensing and bioimaging
Source: Royal Society of Chemistry journal article supplement (doi:10.1039/d3nj00359k), 2023-01-01
Supplement: d3nj00359k1.pdf [file d3nj00359k1.pdf]

## Electronic Supplementary Information (ESI)

### One-step green synthesis of carbon dots derived from *Plumeria alba* flowers for sensing and bioimaging

Ye He,<sup>a,b,†,\*</sup> Xiaojing Chen,<sup>a,b,†</sup> Panlin Wang,<sup>a,b</sup> Xiao Li,<sup>a,b</sup> Bingbing Wang,<sup>a,b</sup> Xiaomeng Wang,<sup>a,b</sup>

Zhuzheng Wu<sup>a,b</sup> and Wenxiang Wang<sup>a,b,\*</sup>

<sup>a</sup>Department of Health Inspection and Quarantine, School of Public Health, Fujian Medical University,  
Fuzhou, Fujian, China.

<sup>b</sup>Fujian Province Key Laboratory of Environment and Health, School of Public Health, Fujian Medical  
University, Fuzhou, Fujian, China.

\* Corresponding author. Tel.: +86-59122862023; Fax: +86-59122862023.

E-mail address: [wangwenxiang@fjmu.edu.cn](mailto:wangwenxiang@fjmu.edu.cn) (W. Wang). [heye@fjmu.edu.cn](mailto:heye@fjmu.edu.cn) (Y. He).

† Authors contributed equally to this work.

## **The elucidation of the static quenching mechanism for detection of Cu<sup>2+</sup>:**

It is well known that nitrogen atoms have the ability to coordinate with copper ions<sup>1</sup>. As illustrated in Fig. 2, there exists amino moieties on the B-paCDs. The amino moieties on the B-paCDs may play a role in the recognition and detection of copper ions. The possible sensing mechanism is that the coordination between Cu<sup>2+</sup> and the amino moieties on the B-paCDs inducing the formation of complex. After complexation, electrons from the conduction band are transferred to the empty d-orbitals of Cu<sup>2+</sup>, causing fluorescence quenching<sup>2</sup>. To further elucidate the mechanism of fluorescence quenching, the UV–vis spectra of B-paCDs, B-paCDs+Cu<sup>2+</sup> and Cu<sup>2+</sup> were carried out. As shown in the Fig. S3a significant decrease in absorption intensity is observed on the UV–vis spectra after adding Cu<sup>2+</sup> (100 μM) into B-paCDs solutions, hinting that a static quenching mechanism has occurred<sup>3</sup>. Moreover, fluorescence lifetimes of B-paCDs before and after adding Cu<sup>2+</sup> (100 μM) were measured to ascertain the mechanism. In Fig. S3b, the fluorescence lifetime of the B-paCDs is 6.64ns. The lifetime decreased to 6.63 ns after adding Cu<sup>2+</sup> (100 μM) into the solution of B-paCDs. The nearly identical fluorescence lifetimes proves that it is static quenching<sup>4</sup>.

## Figures

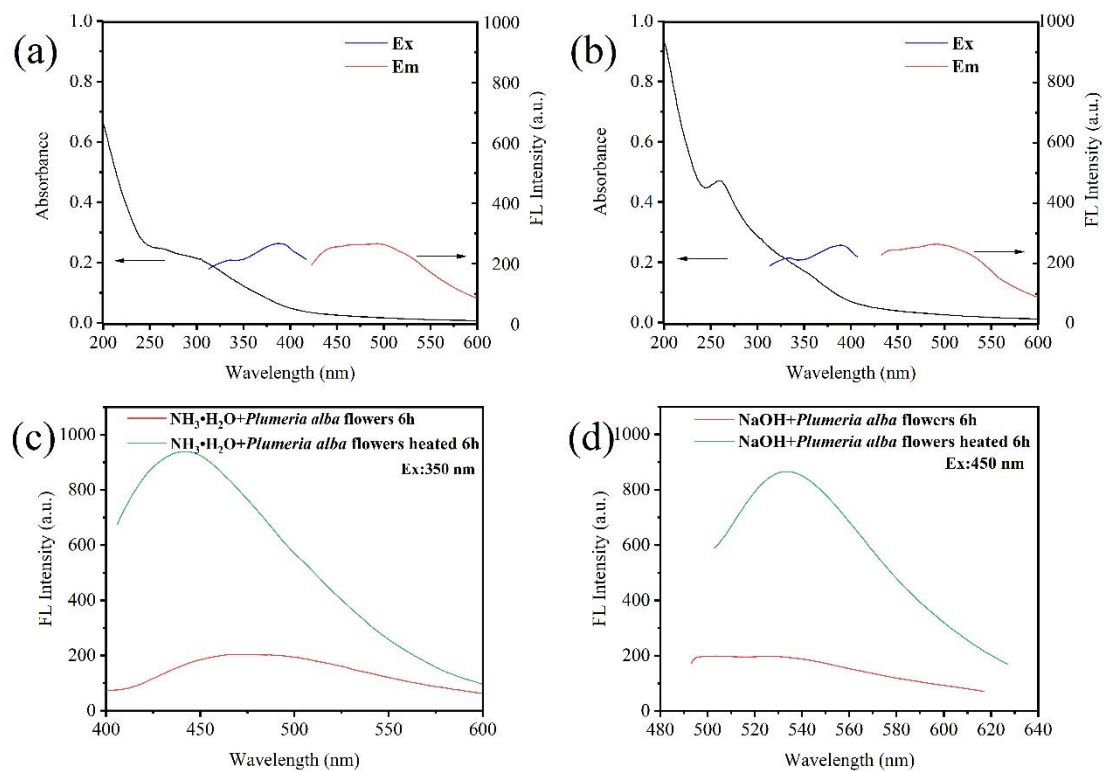

**Fig. S1** UV-vis absorption, fluorescence excitation and emission spectra of the ammonia water (a) and NaOH water (b) containing dried *Plumeria alba* flower (without heating, after 6 h), respectively. PL spectra of the ammonia water (c) containing dried *Plumeria alba* flower (with or without heating, after 6 h) and NaOH water (d) containing dried *Plumeria alba* flower (with or without heating, after 6h), respectively.

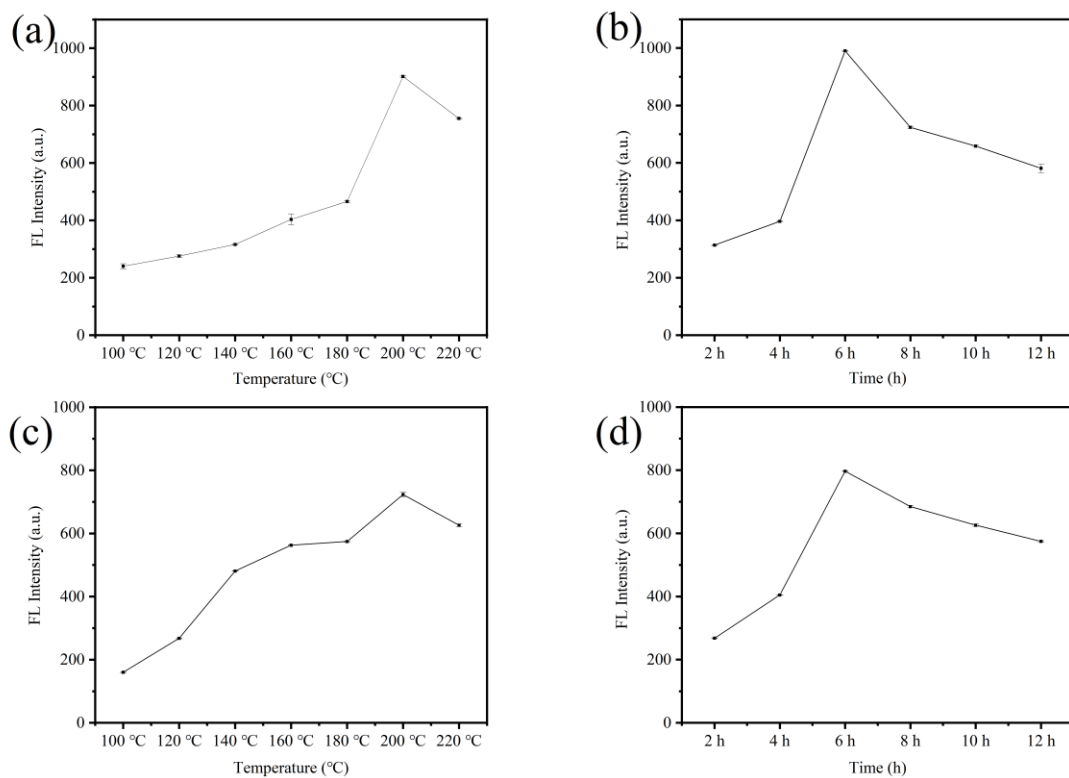

**Fig. S2** Effects of different reaction temperatures (a) and reaction times (b) on the fluorescence intensity of B-paCDs. Effects of different reaction temperatures (c) and reaction times (d) on the fluorescence intensity of G-paCDs.

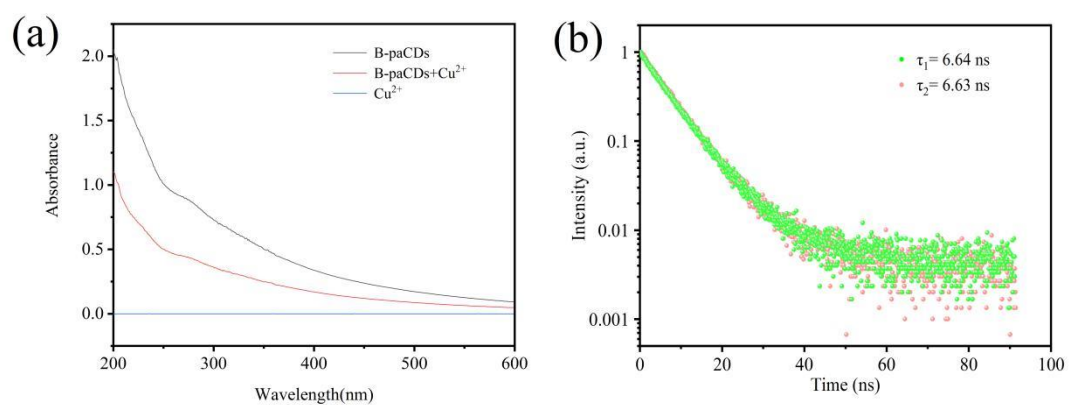

**Fig. S3** UV-vis spectra of B-paCDs, B-paCDs+Cu<sup>2+</sup> and Cu<sup>2+</sup> (a). The fluorescence lifetimes of B-paCDs before and after adding Cu<sup>2+</sup> (b).

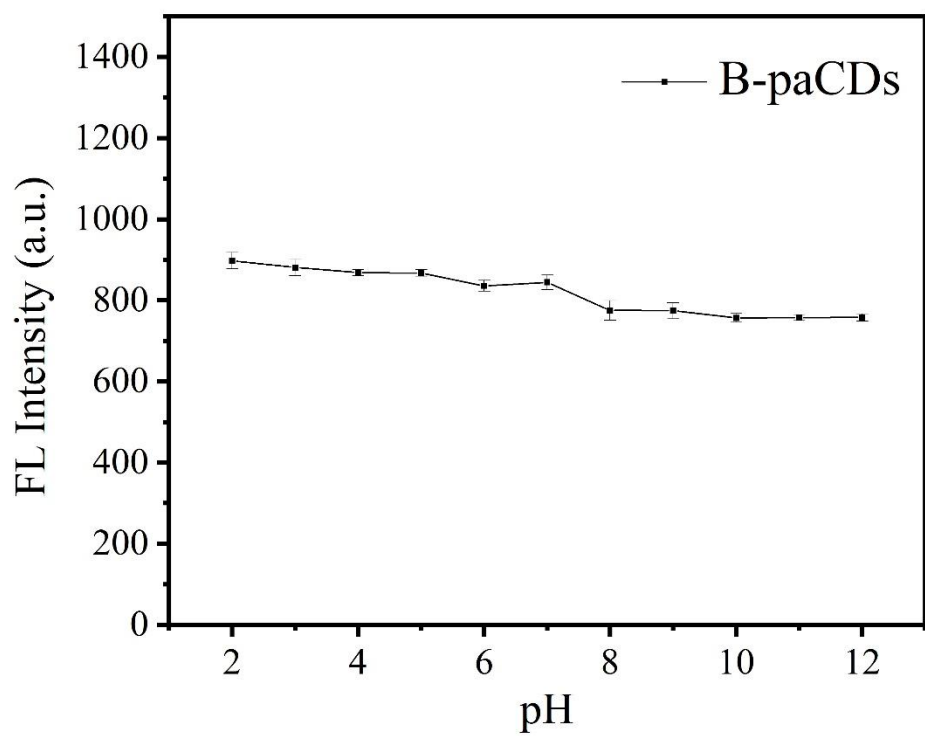

**Fig. S4** Dose–response curve for the FL intensity of B-paCDs with pH.

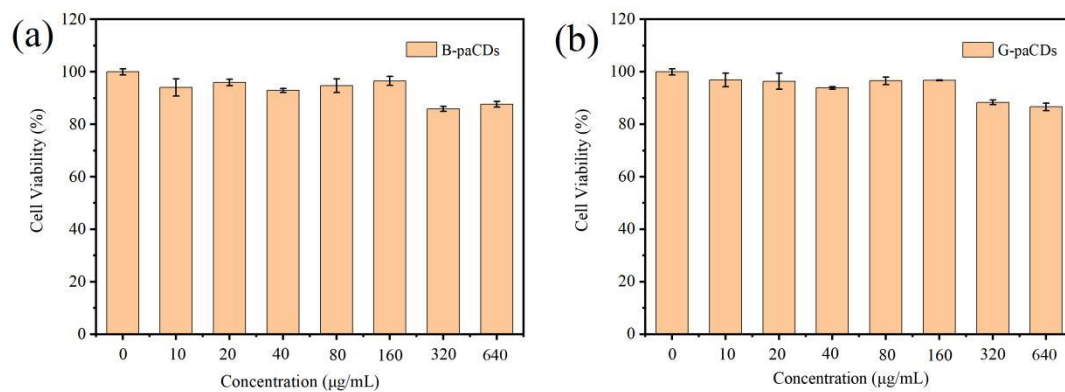

**Fig. S5** Cell viabilities of HepG2 cells with different concentrations of B-paCDs (a) and G-paCDs (b).

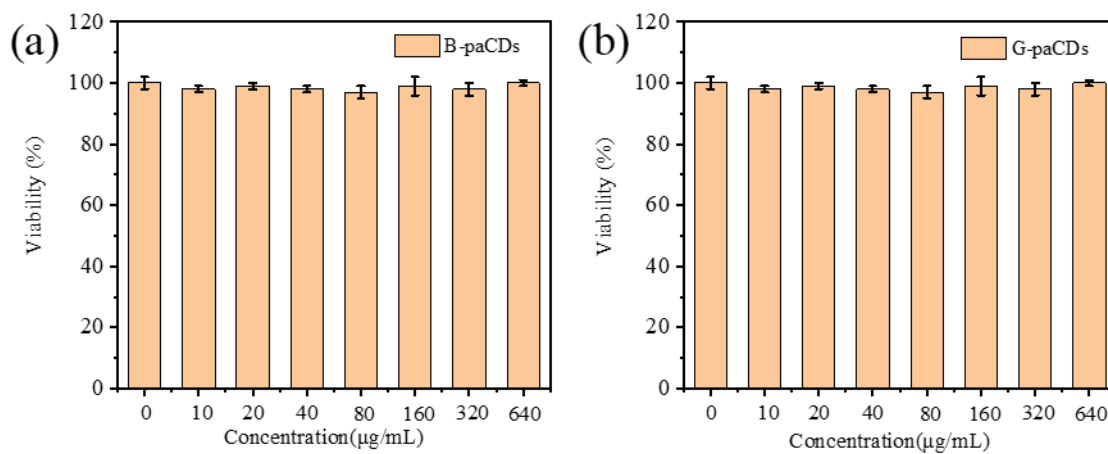

**Fig. S6** Toxicity experiments of *C. elegans* incubated with different concentrations of the B-paCDs (a) and G-paCDs (b).

## Tables

Table S1 Comparison of different green synthetic CDs for detection of Cu<sup>2+</sup>.

| Fluorescent probes | Raw material                                                                    | Linear range                         | Detection limit      | Ref.      |
|--------------------|---------------------------------------------------------------------------------|--------------------------------------|----------------------|-----------|
| CQDs               | Rambutan and Pandan leaves                                                      | -                                    | 123.67 $\mu\text{M}$ | 5         |
| OPD-CDs            | o-phenylenediamine                                                              | 0.5 $\mu\text{M}$ - 40 $\mu\text{M}$ | 0.28 $\mu\text{M}$   | 6         |
| N-CDs              | polyethylene glycol 20,000 and p-phenylenediamine                               | 45-70 $\mu\text{M}$                  | 45.87 $\mu\text{M}$  | 7         |
| BTSC-CDs           | EDTA                                                                            | 0.20–30 $\mu\text{M}$                | 0.27 $\mu\text{M}$   | 8         |
| B,N-CDs            | APBA                                                                            | 1–25 $\mu\text{M}$                   | 0.3 $\mu\text{M}$    | 9         |
| CDs-Cl,P           | sucrose, muriatic acid and phosphoric acid                                      | 5 $\mu\text{M}$ - 100 $\mu\text{M}$  | 0.14 $\mu\text{M}$   | 10        |
| N.S-CDs            | CA and TSC                                                                      | 5-125 $\mu\text{M}$                  | 1.326 $\mu\text{M}$  | 11        |
| h-CDs              | o-phenylenediamine and terephthalic acid                                        | 0-10 $\mu\text{M}$                   | 0.18 $\mu\text{M}$   | 12        |
| NECDs              | citric acid, polyoxyethylene bis(amine), polyvinyl polyamine and norepinephrine | 0.1-10 $\mu\text{M}$                 | 0.18 $\mu\text{M}$   | 13        |
| N-CDs              | Ascorbic acid and urea                                                          | -                                    | 0.15 $\mu\text{M}$   | 14        |
| CDs                | radish                                                                          | 10-60 $\mu\text{M}$                  | 6.8 $\mu\text{M}$    | 15        |
| FCDs               | peanut shells                                                                   | 0-5 $\mu\text{M}$                    | 4.8 $\mu\text{M}$    | 16        |
| C-dots             | coconut water and ethanol                                                       | 10 - 50 $\mu\text{M}$                | 0.28 $\mu\text{M}$   | 17        |
| BPEI-CQDs          | bamboo leaves                                                                   | 0.333-5.66 $\mu\text{M}$             | 0.115 $\mu\text{M}$  | 18        |
| G-CDs              | <i>Spirulina</i> algae powder                                                   | 0 - 45 $\mu\text{M}$                 | 3.5 $\mu\text{M}$    | 19        |
| B-paCDs            | <i>Plumeria alba</i> flowers                                                    | 0.1 -100 $\mu\text{M}$               | 0.08 $\mu\text{M}$   | This work |

## References

1. Z. Fu, J. He, Y. Li, H. Ding, X. Gao, F. J. S. A. P. A. M. Cui and B. Spectroscopy, 2023, **287**, 122052.
2. P. Shasha, J. H. Kim, S. J. J. J. o. n. Park and nanotechnology, 2019, **19**, 6077-6082.
3. S. Huang, L. Wang, C. Huang, J. Xie, W. Su, J. Sheng, Q. J. S. Xiao and A. B. Chemical, 2015, **221**, 1215-1222.
4. S. Liao, X. Huang, H. Yang, X. J. A. Chen and b. chemistry, 2018, **410**, 7701-7710.
5. L. D. Kasmiarno, A. Fikarda, R. K. Gunawan, I. Isnaeni, S. Supandi and N. S. J. C. Sambudi, 2021, **9**.
6. W. Lv, M. Lin, R. Li, Q. Zhang, H. Liu, J. Wang and C. Huang, *Chinese Chemical Letters*, 2019, **30**, 1410-1414.
7. H. Zhao, R. Li, Y. Wang, Z. Zhao and S. Shuang, *Journal of Photochemistry and Photobiology A: Chemistry*, 2023, **439**.
8. Z. Fu, J. He, Y. Li, H. Ding, X. Gao and F. Cui, *Spectrochim Acta A Mol Biomol Spectrosc*, 2023, **287**, 122052.
9. M.-C. Rong, K.-X. Zhang, Y.-R. Wang and X. Chen, *Chinese Chemical Letters*, 2017, **28**, 1119-1124.
10. Y. Yang, Y. Jiang, X. Wang and S. Han, *Spectrochim Acta A Mol Biomol Spectrosc*, 2022, **279**, 121434.
11. S. F. El-Malla, E. A. Elshenawy, S. F. Hammad and F. R. Mansour, *Anal Chim Acta*, 2022, **1197**, 339491.
12. C. Yu, D. Zhang, Q. Zhu, D. Chao, H. Liu and L. Zhou, *Dyes and Pigments*, 2022, **198**.
13. X. Chen, Y. Zhuang, J. Chen, J. Lin, J. Chen and Z. Han, *Microchemical Journal*, 2022, **181**.
14. M. Bhatt, S. Bhatt, G. Vyas, I. H. Raval, S. Haldar and P. Paul, *ACS Applied Nano Materials*, 2020, **3**, 7096-7104.
15. J. Praneerad, N. Thongsai, P. Supchocksoonthorn, S. Kladsomboon and P. Paoprasert, *Spectrochimica Acta Part A: Molecular and Biomolecular Spectroscopy*, 2019, **211**, 59-70.
16. X. Ma, Y. Dong, H. Sun and N. Chen, *Materials Today Chemistry*, 2017, **5**, 1-10.
17. R. Purbia and S. Paria, *Biosens Bioelectron*, 2016, **79**, 467-475.
18. Y. Liu, Y. Zhao and Y. Zhang, *Sensors and Actuators B: Chemical*, 2014, **196**, 647-652.
19. E. Emami and M. H. Mousazadeh, *Journal of Photochemistry and Photobiology A: Chemistry*, 2021, **418**.
